# Supplementary material for: Isolation and Screening of Antagonistic Endophytes against Phytophthora infestans and Preliminary Exploration on Anti-oomycete Mechanism of Bacillus velezensis 6-5
Source: MDPI journal article supplement (doi:10.3390/plants12040909), 2023-02-17
Supplement: s1 [file s1]

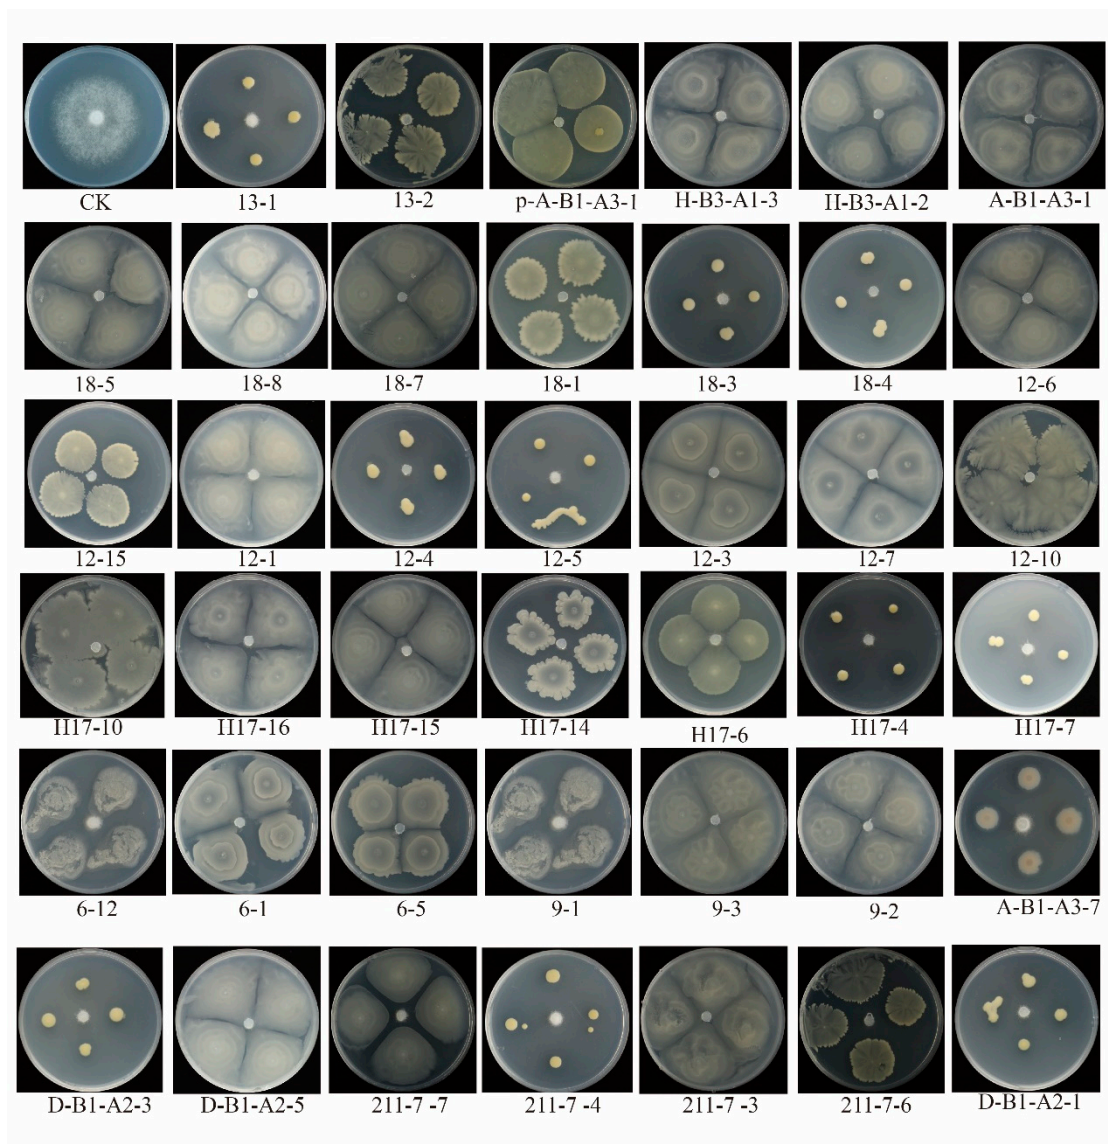

**Figure S1.** Endophytic isolates with antagonistic activity against *Phytophthora infestans* T30-4 *in vitro*.

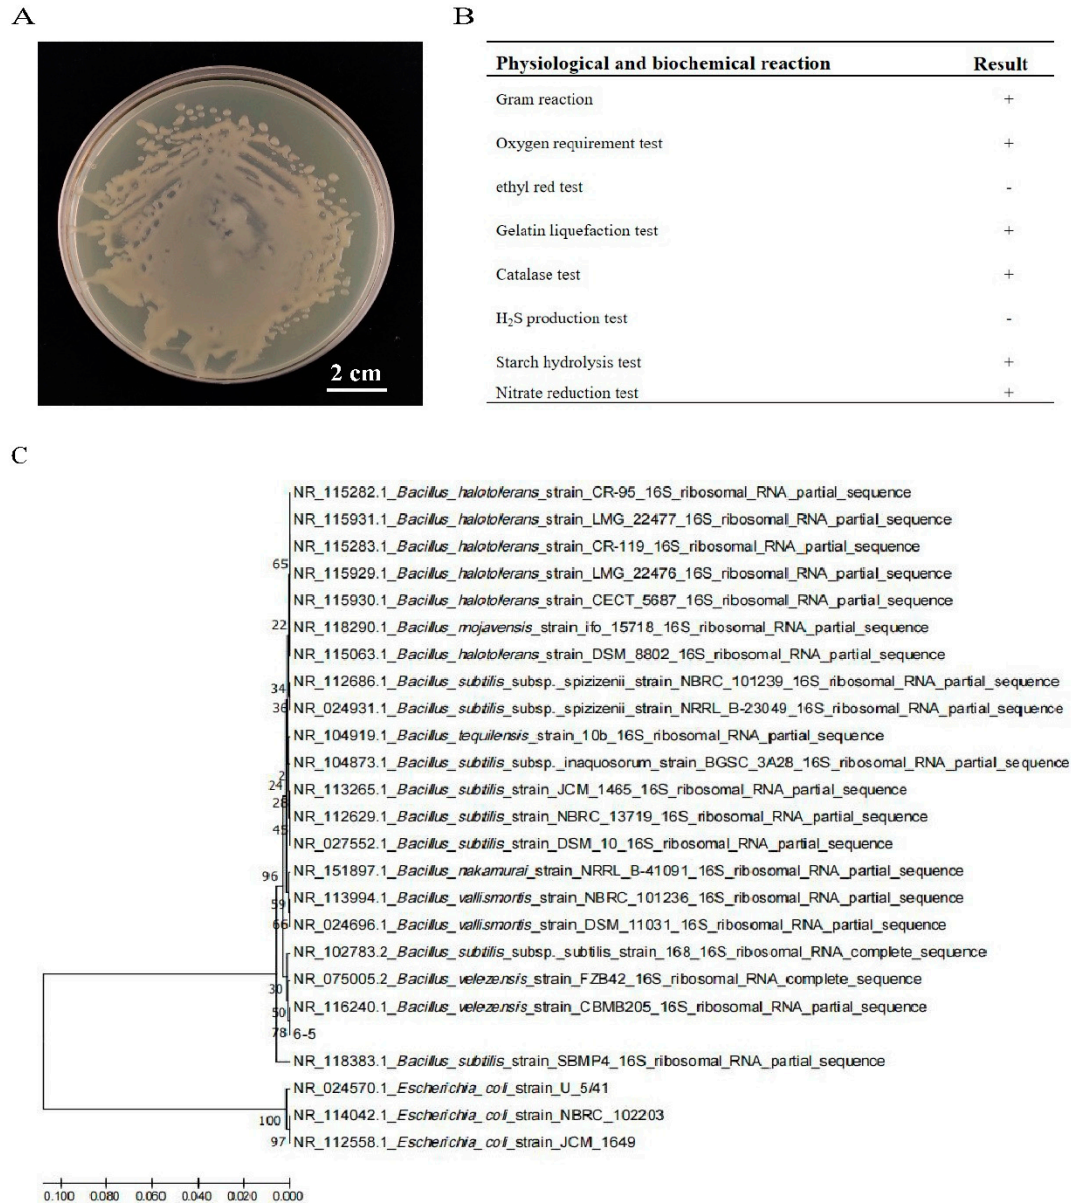

**Figure S2.** Identification of endophyte 6-5. (A) Colony characteristics of 6-5; (B) Physiological and biochemical characteristics of 6-5, + indicates a positive reaction, - indicates a negative reaction; (C) The phylogenetic tree of 6-5.
